# Supplementary material for: Non-invasive biomarkers for early diagnosis of pancreatic cancer risk: metabolite genomewide association study based on the KCPS-II cohort
Source: Springer Nature journal article supplement (doi:10.1186/s12967-023-04670-x), 2023-12-04

# Supplementary figure 1. Heatmap of metabolite abundance in each group

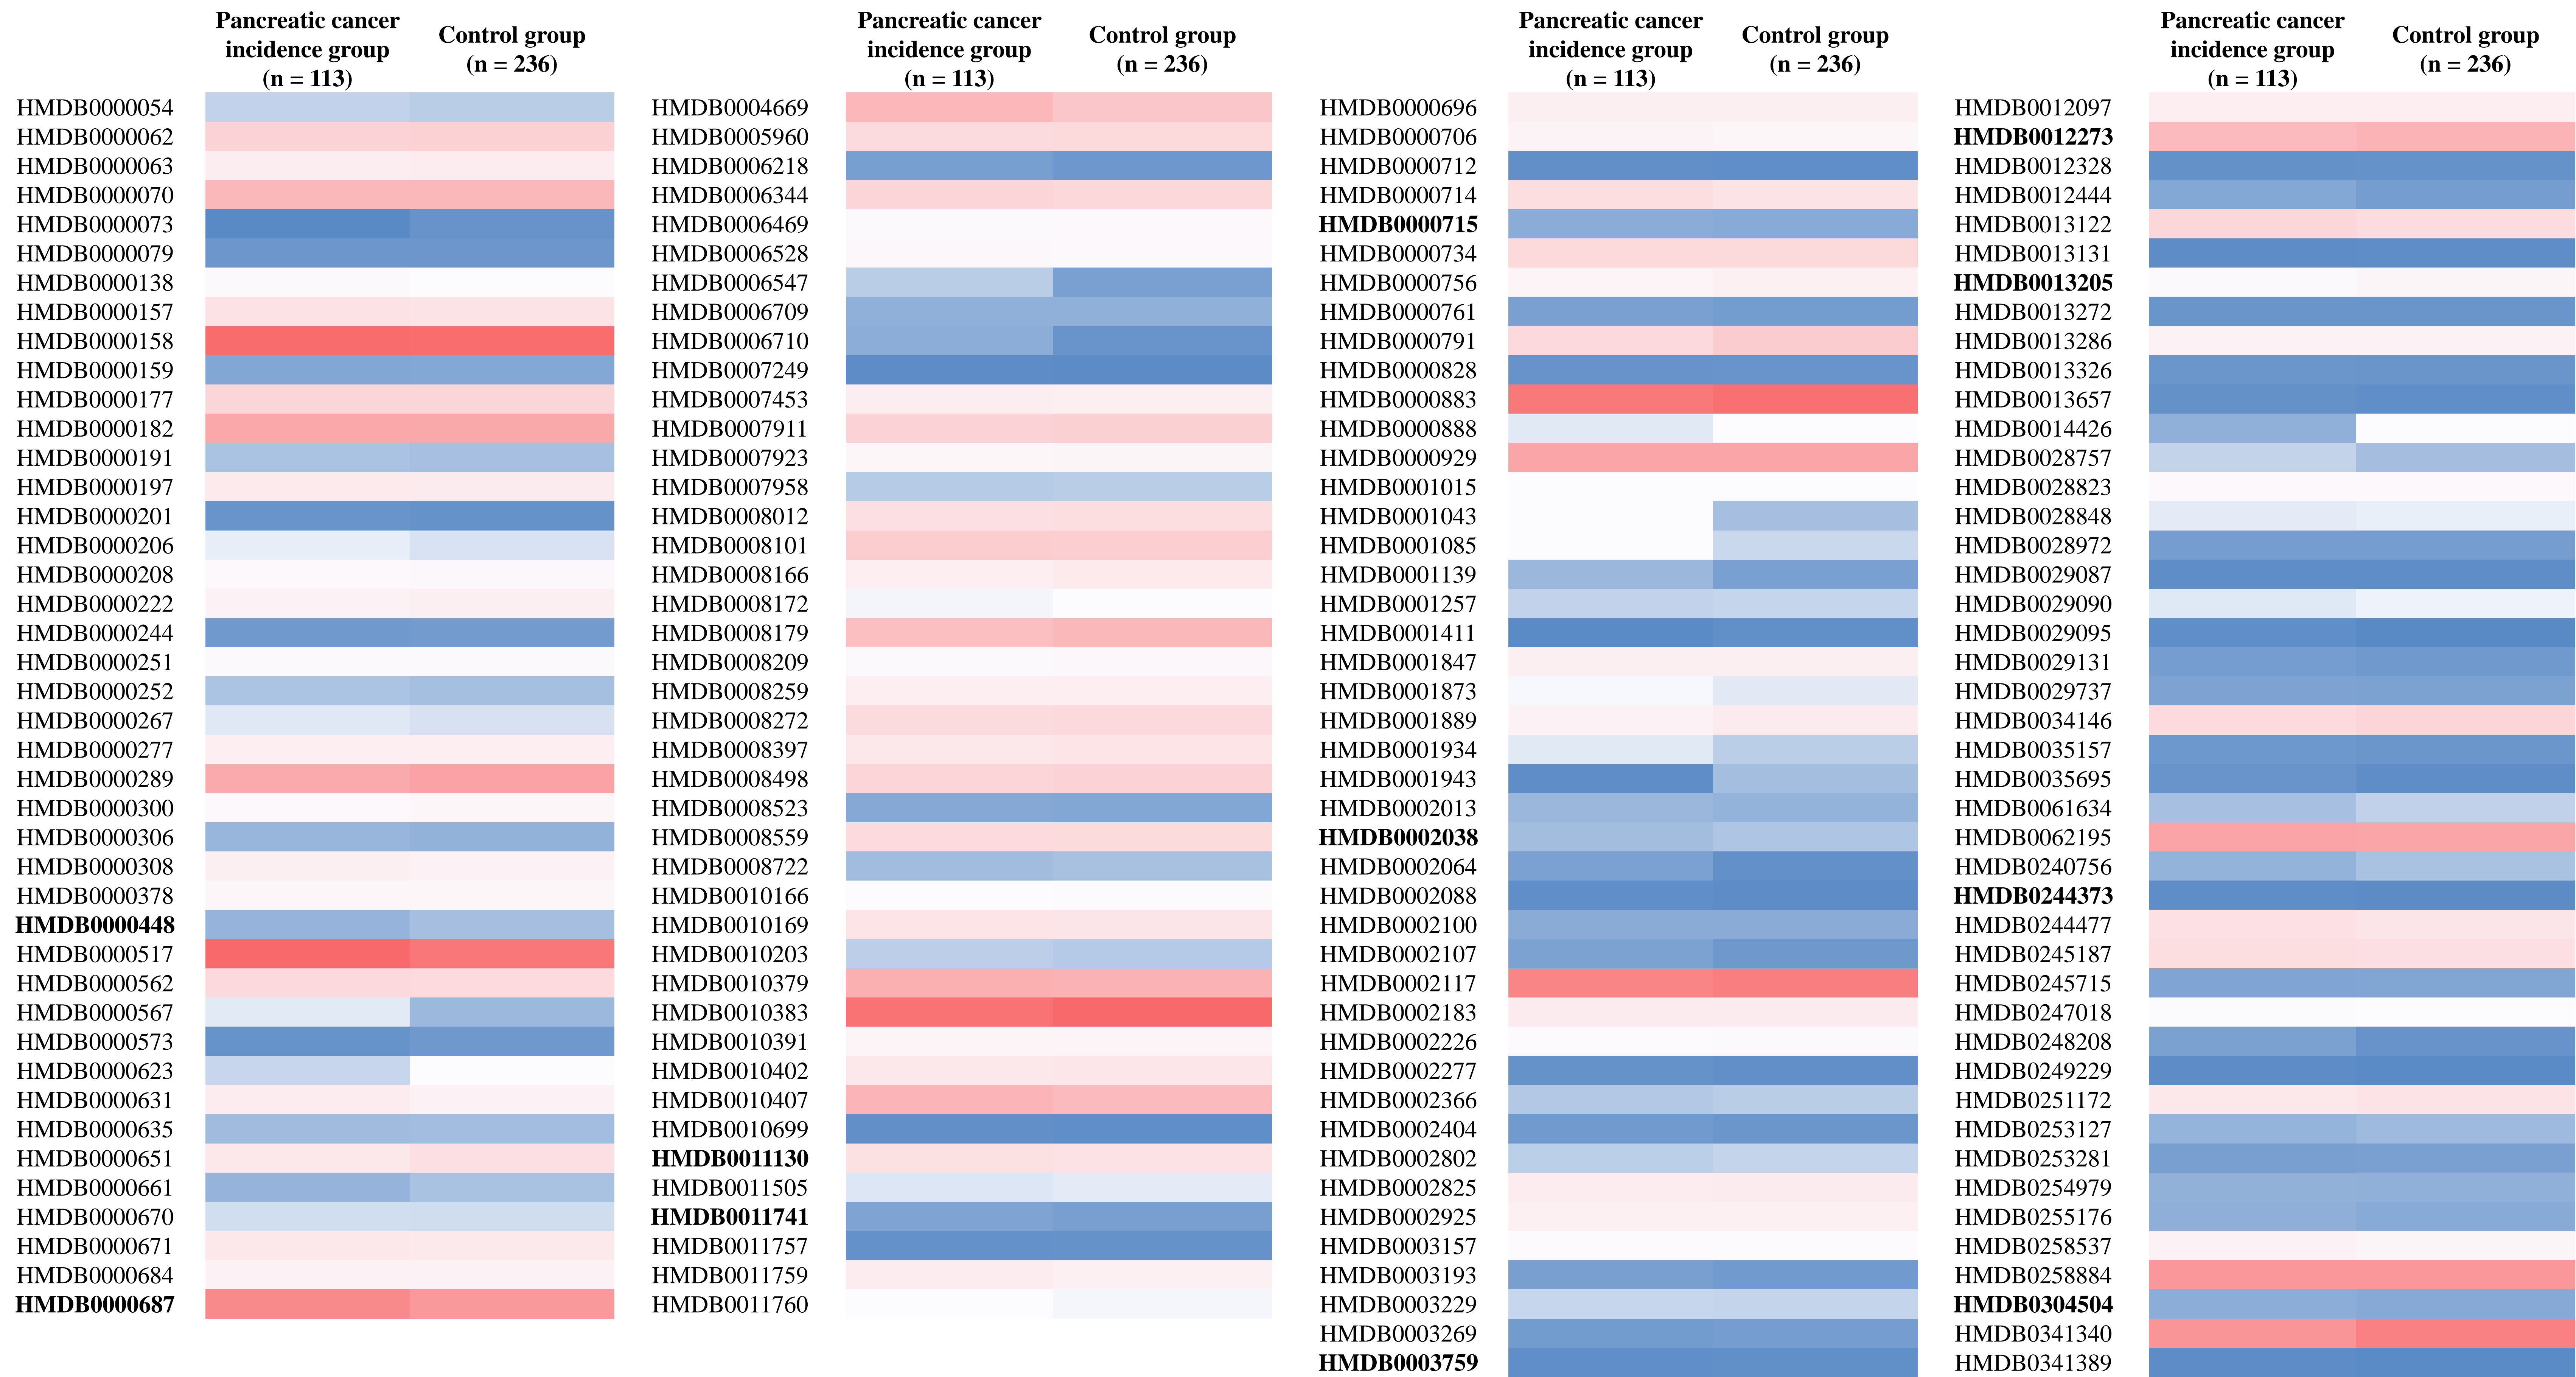

\*Significant Metabolites in OPLS-DA (VIP>1.0) are written in **bold**.

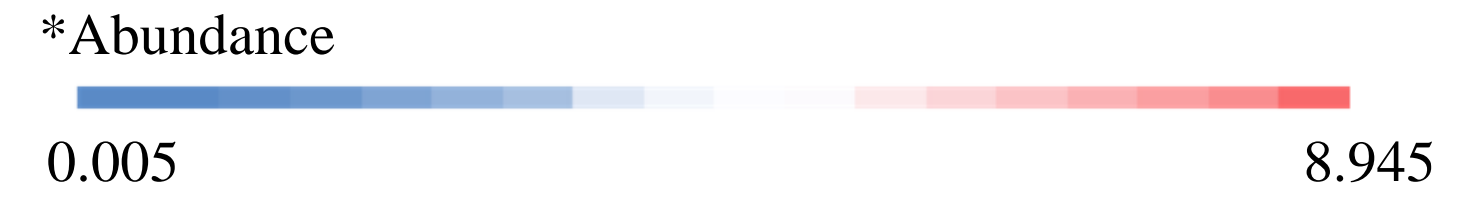



# Supplementary figure 2. Manhattan plot from GWAS

HMDB0244373

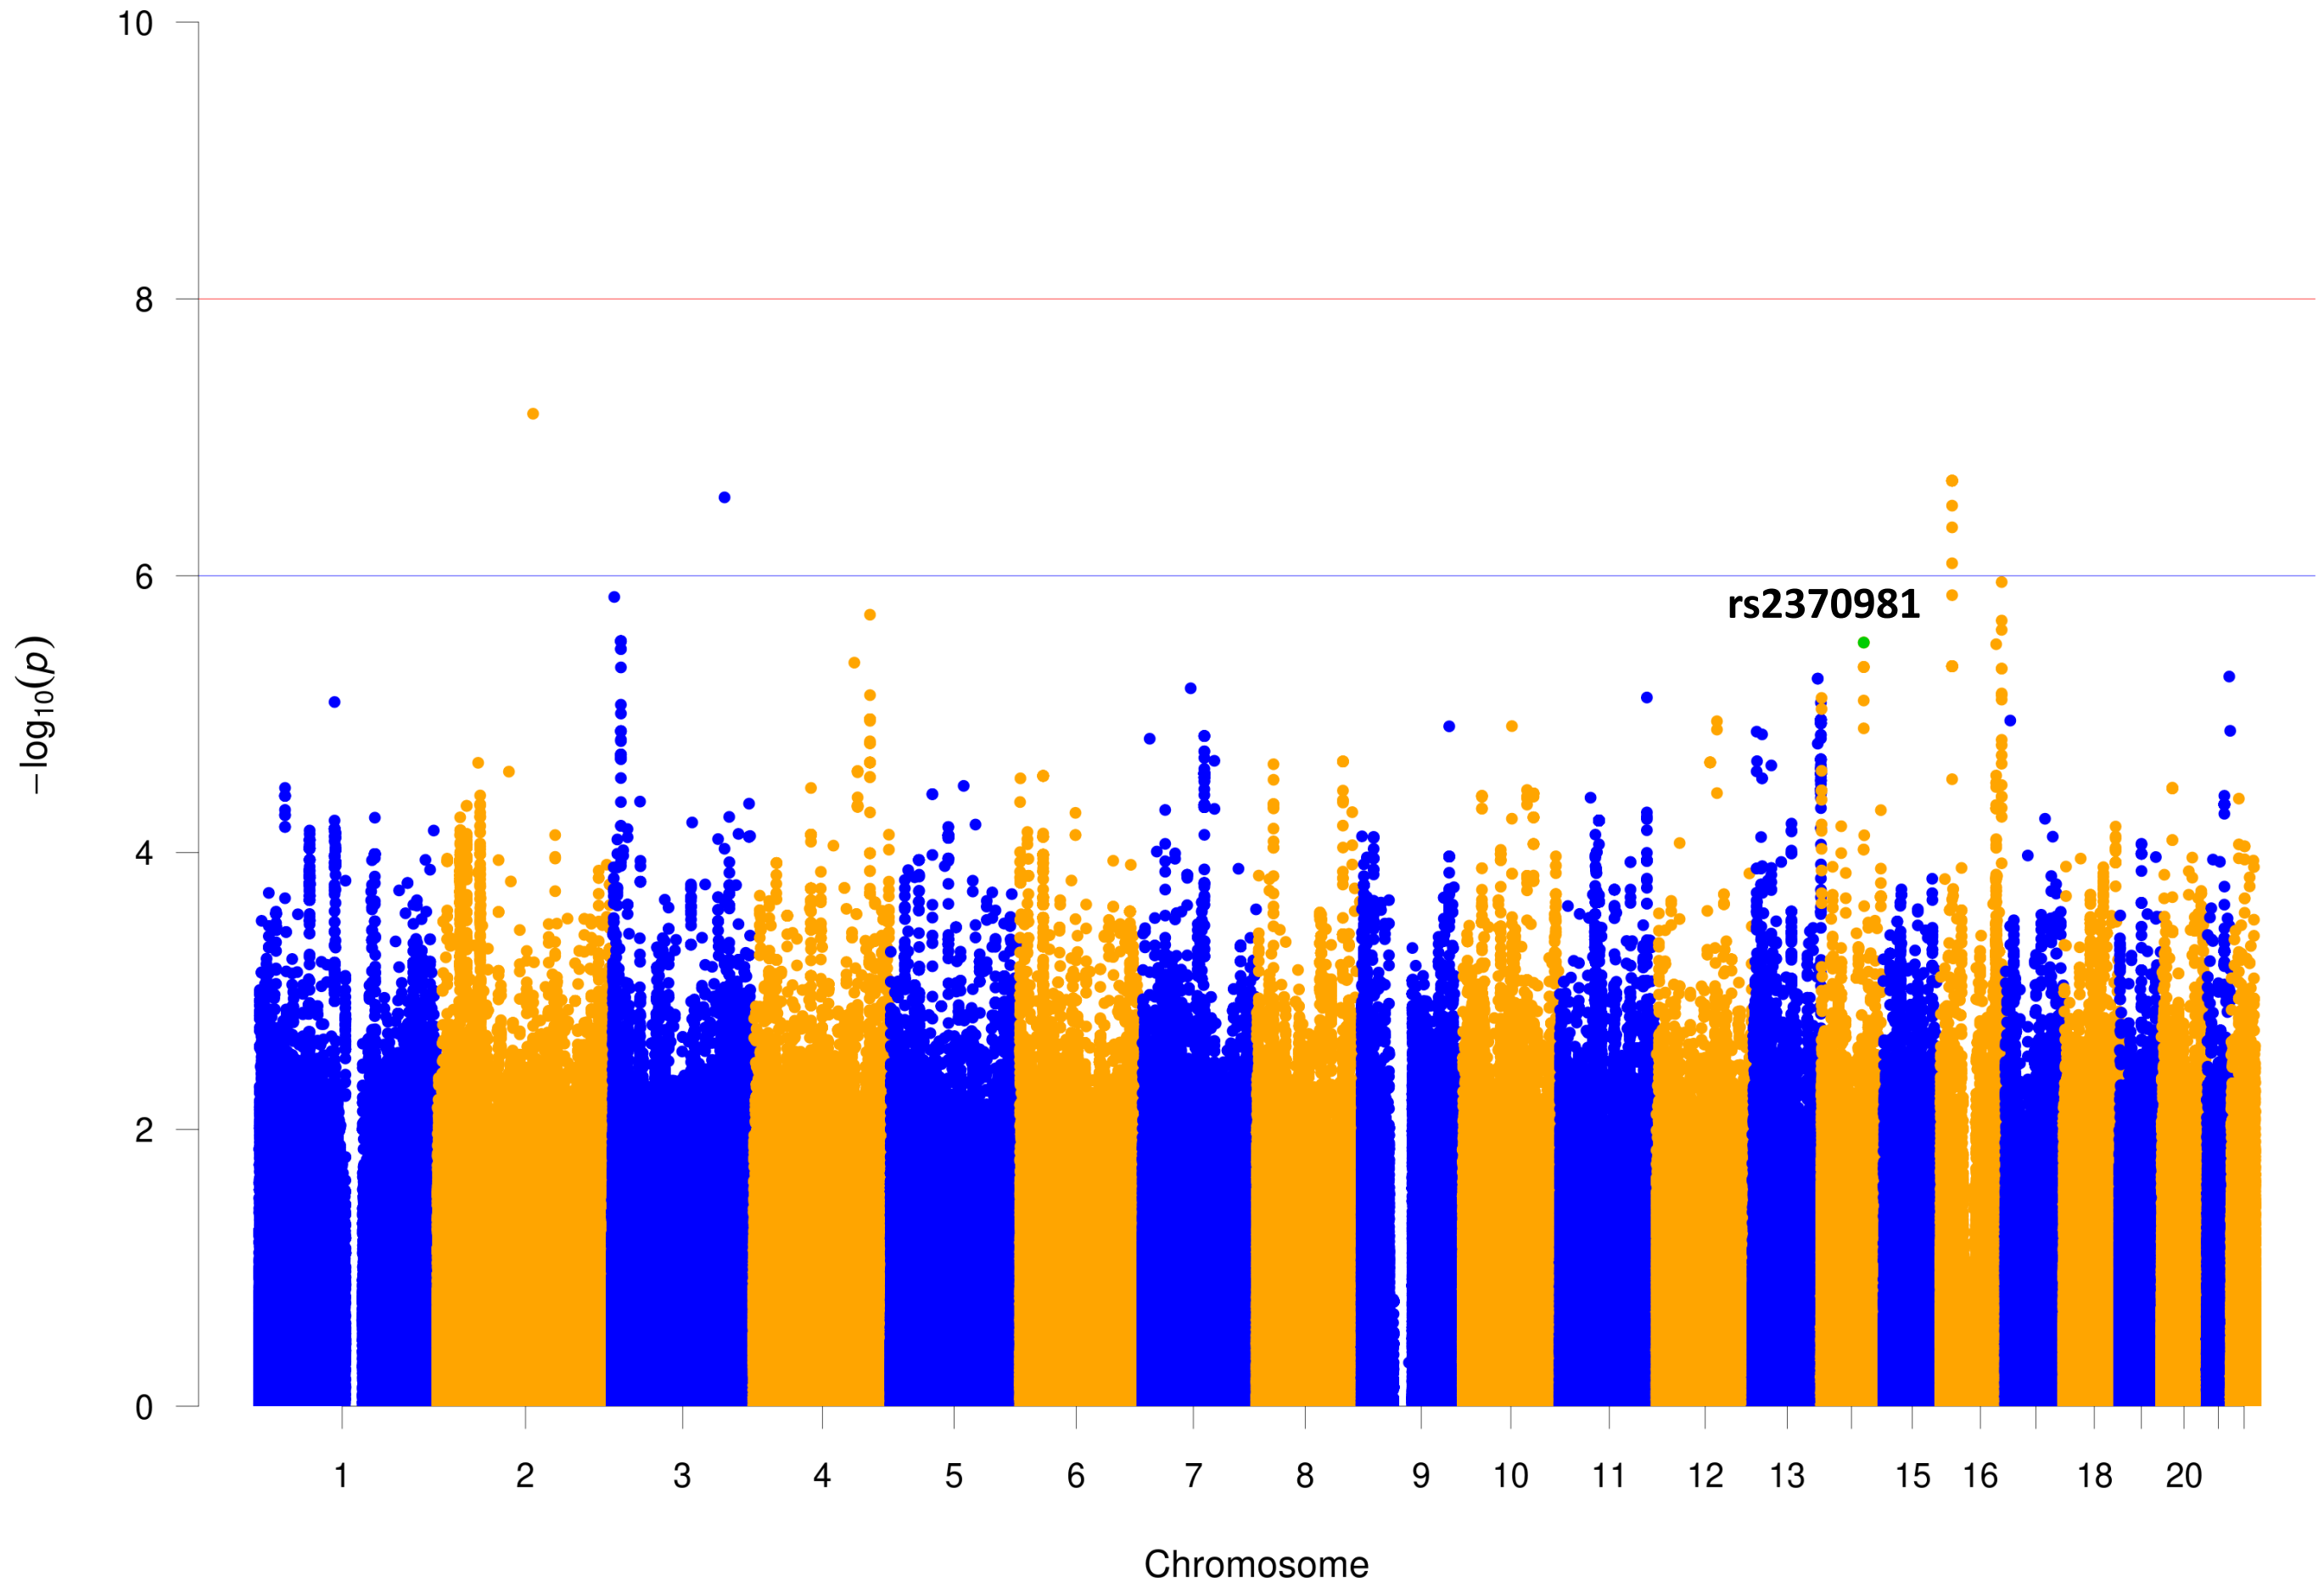

HMDB0011741

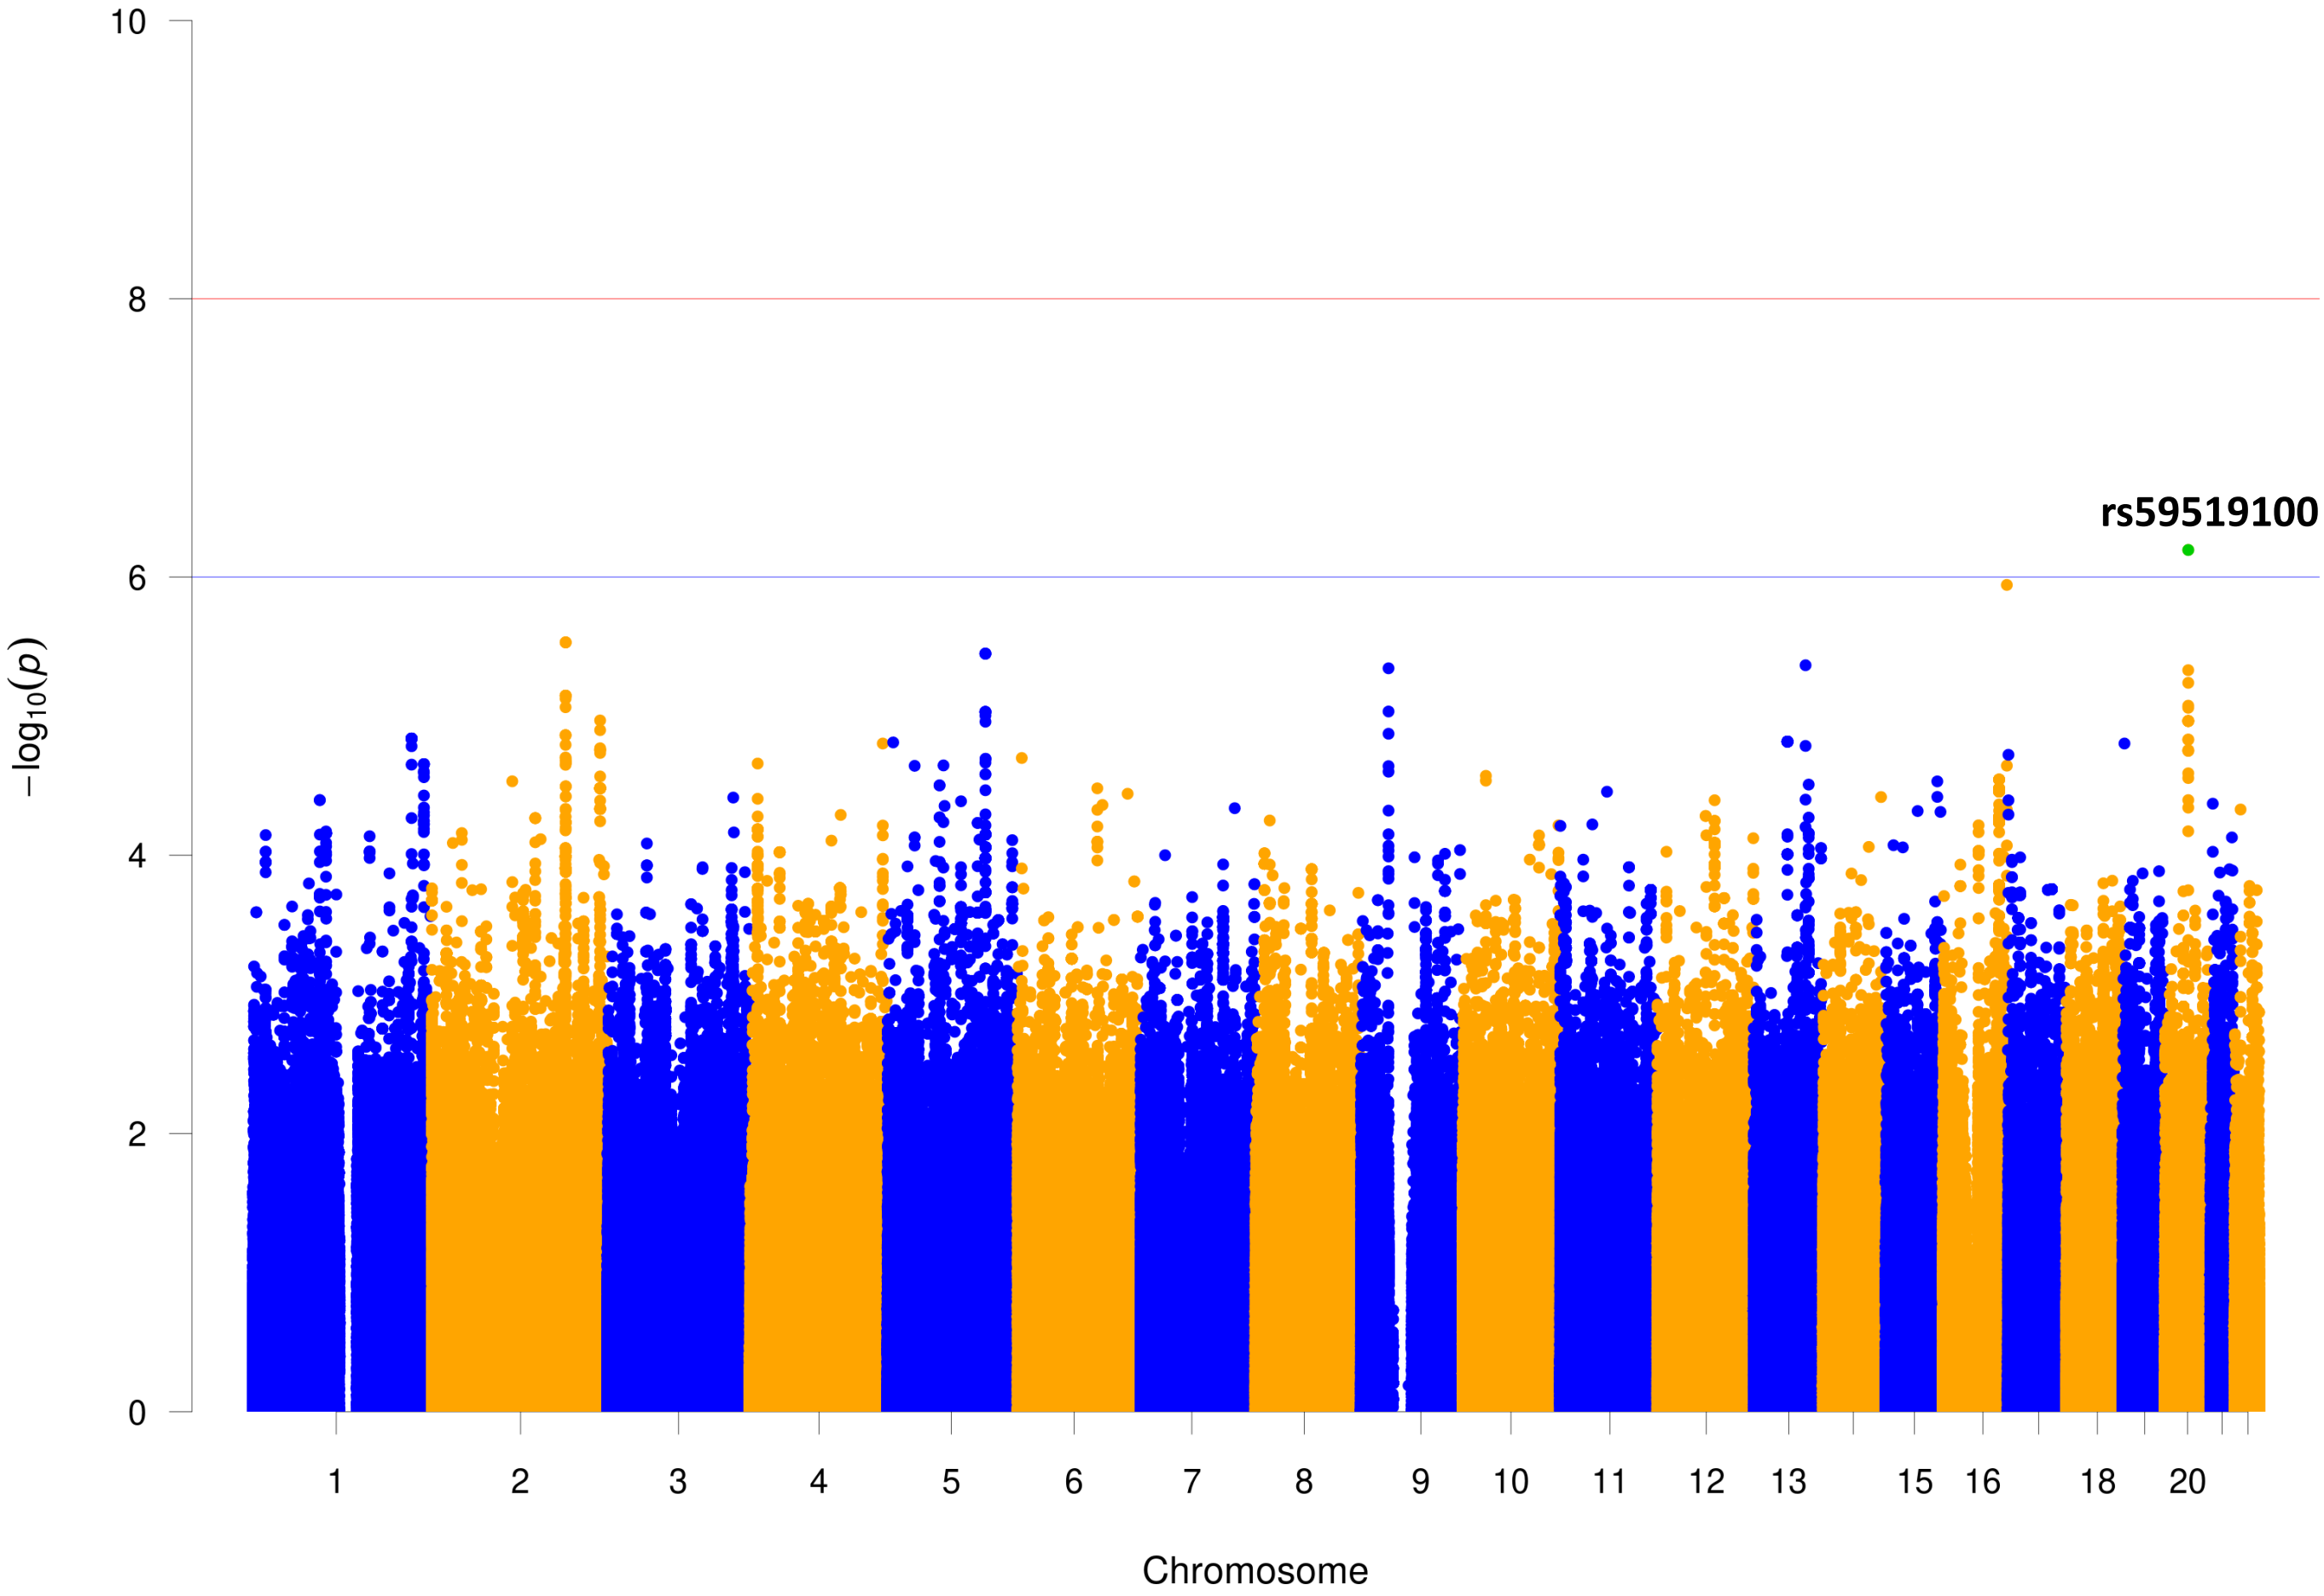

HMDB0011130

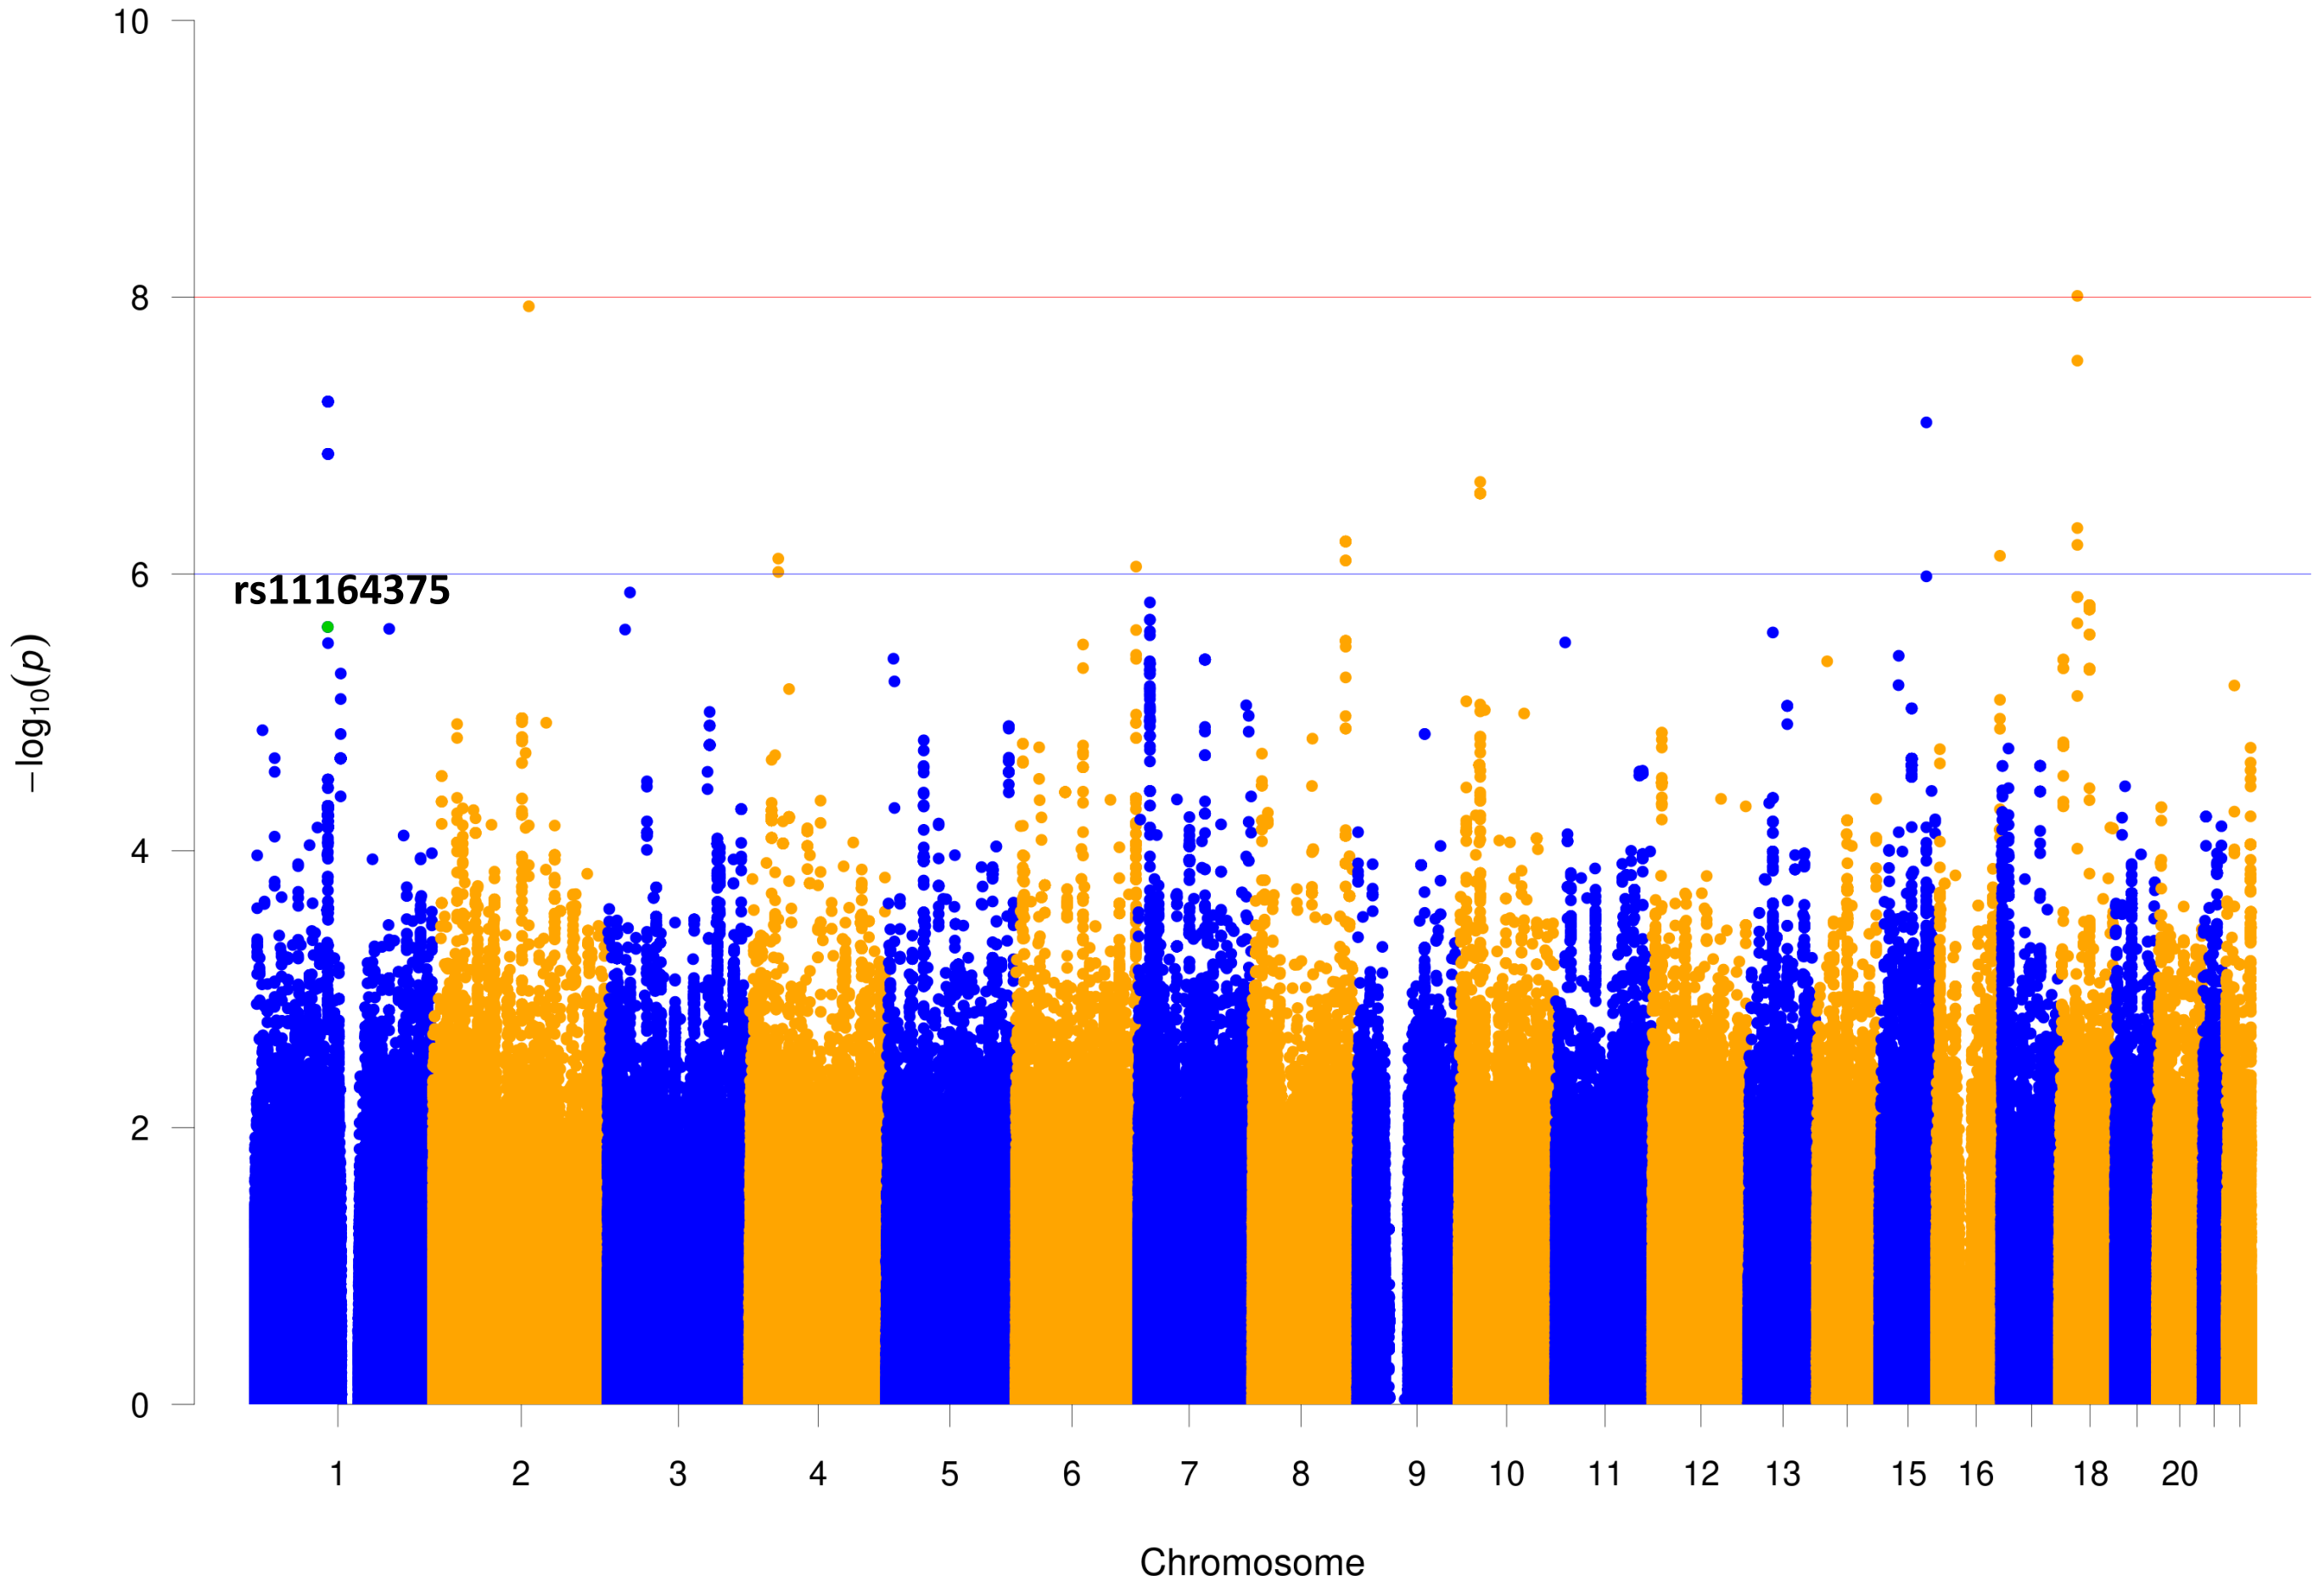

HMDB0000687

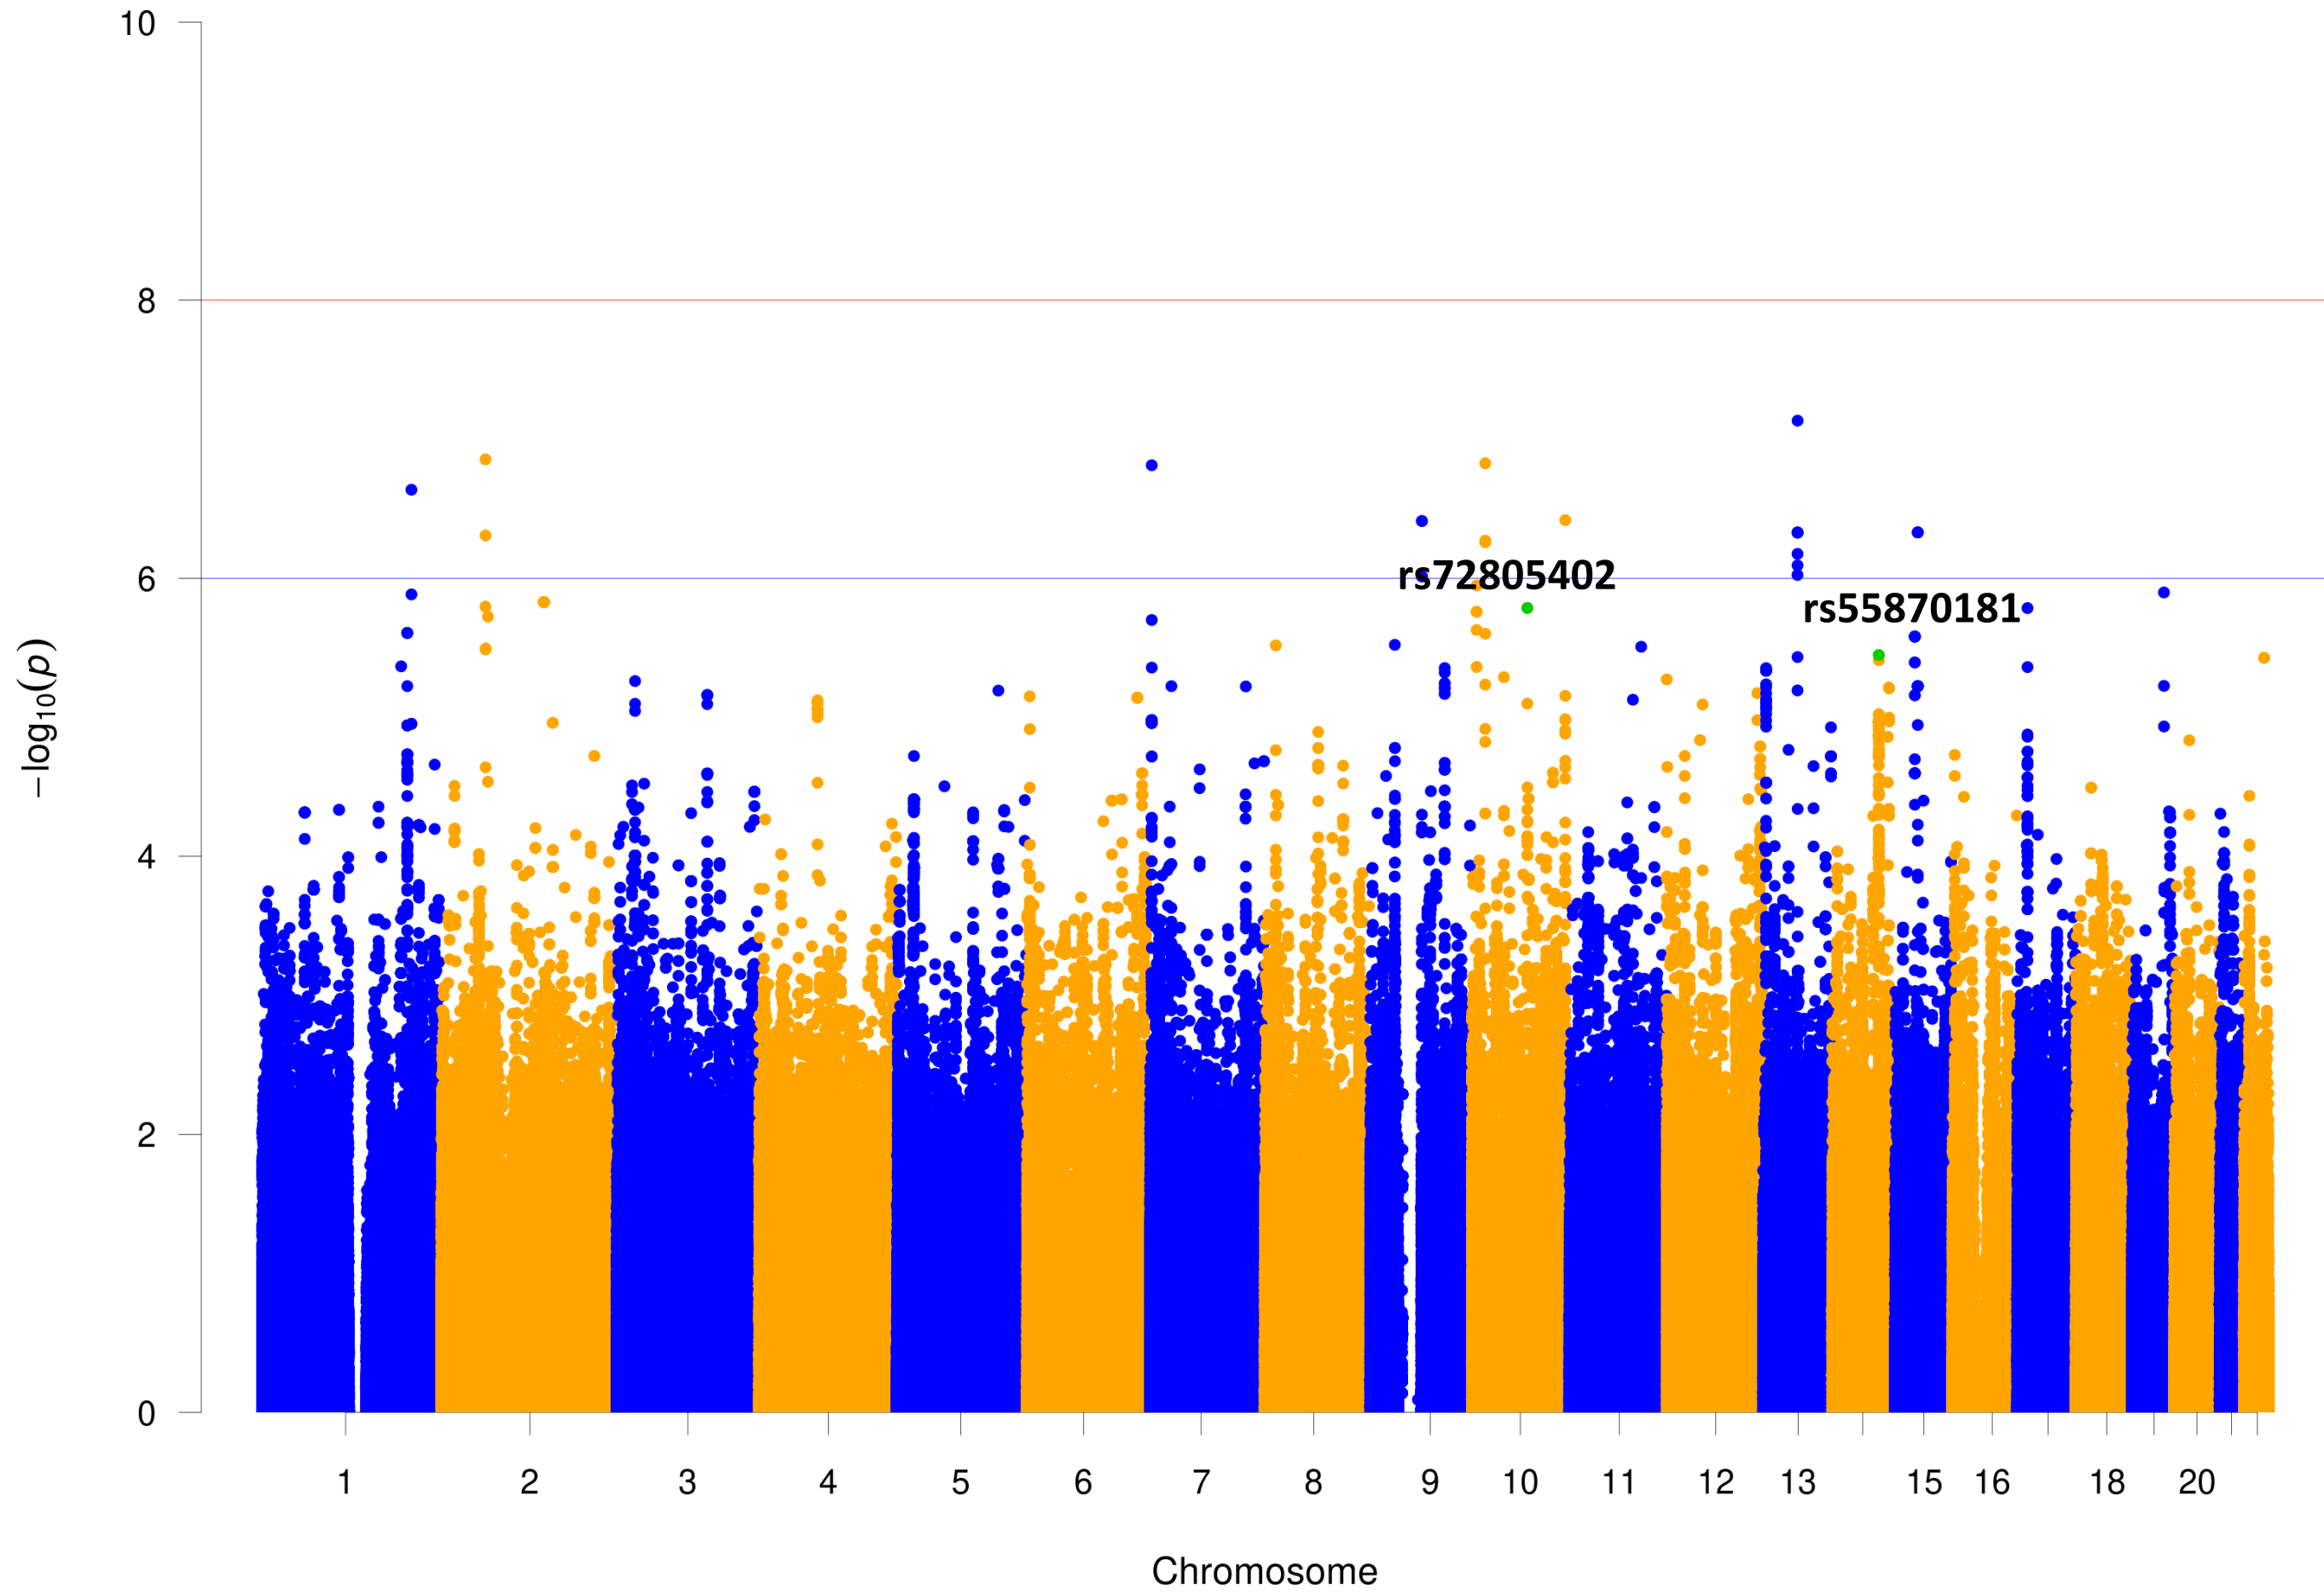

# Supplementary figure 3. Moderation effect of smoking on association between metabolites and pancreatic cancer risk

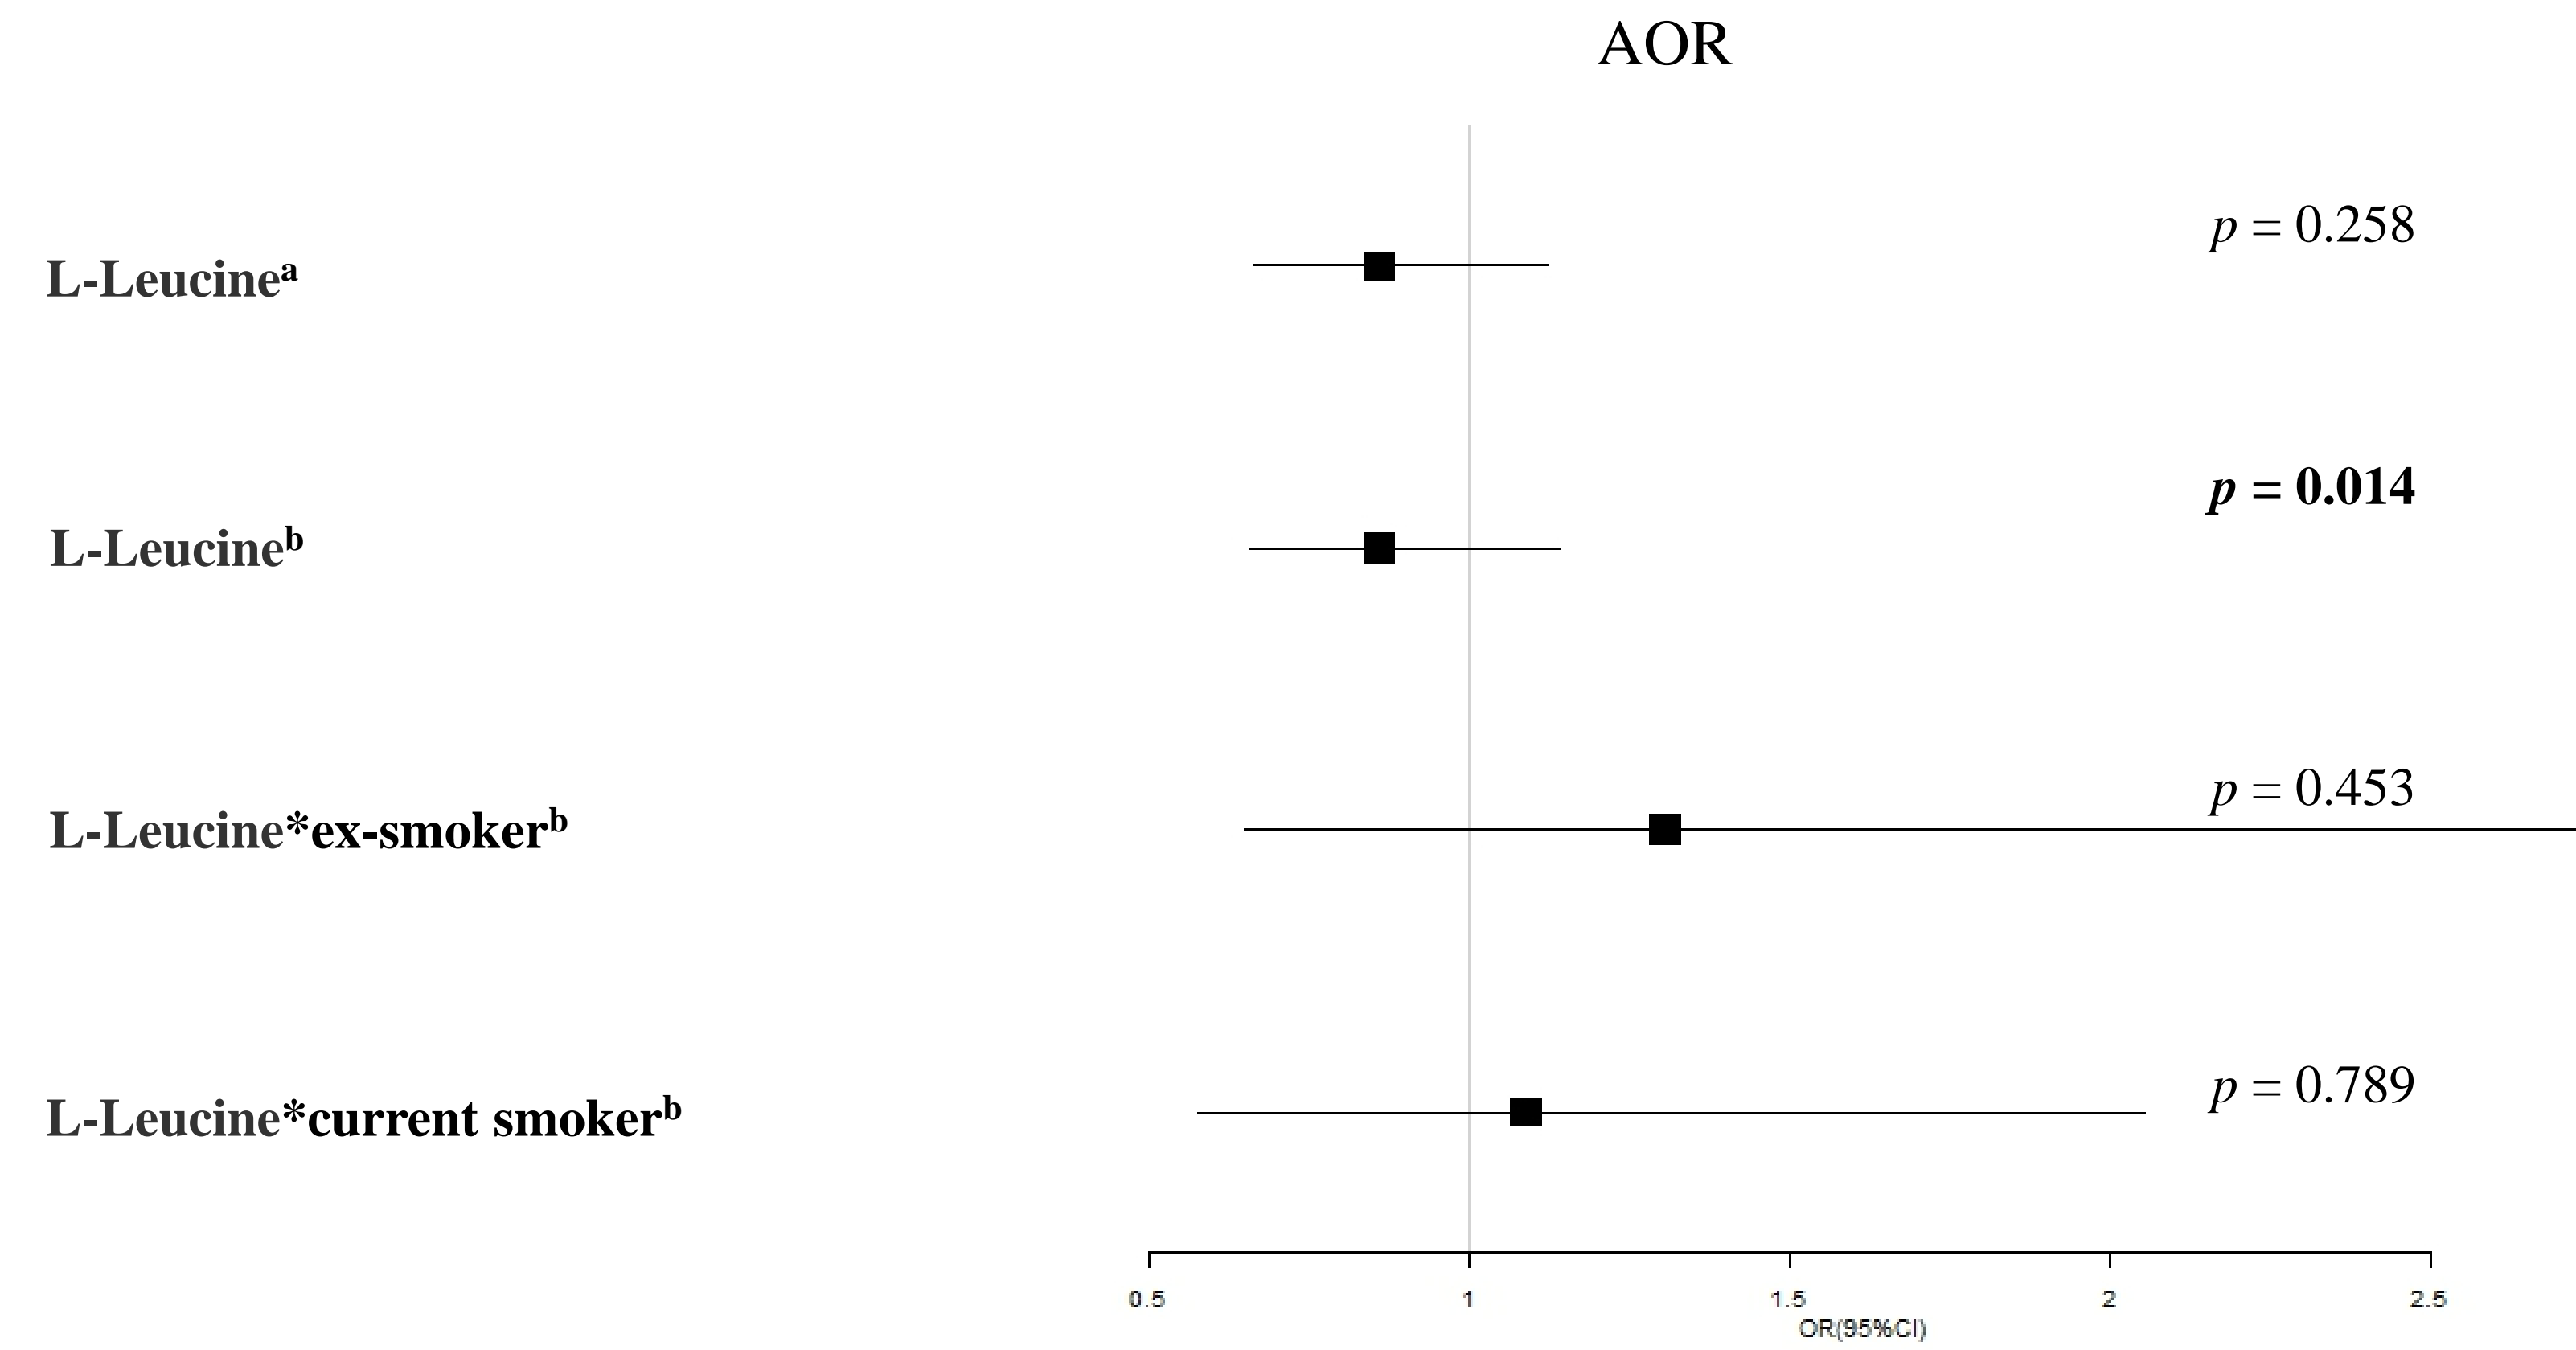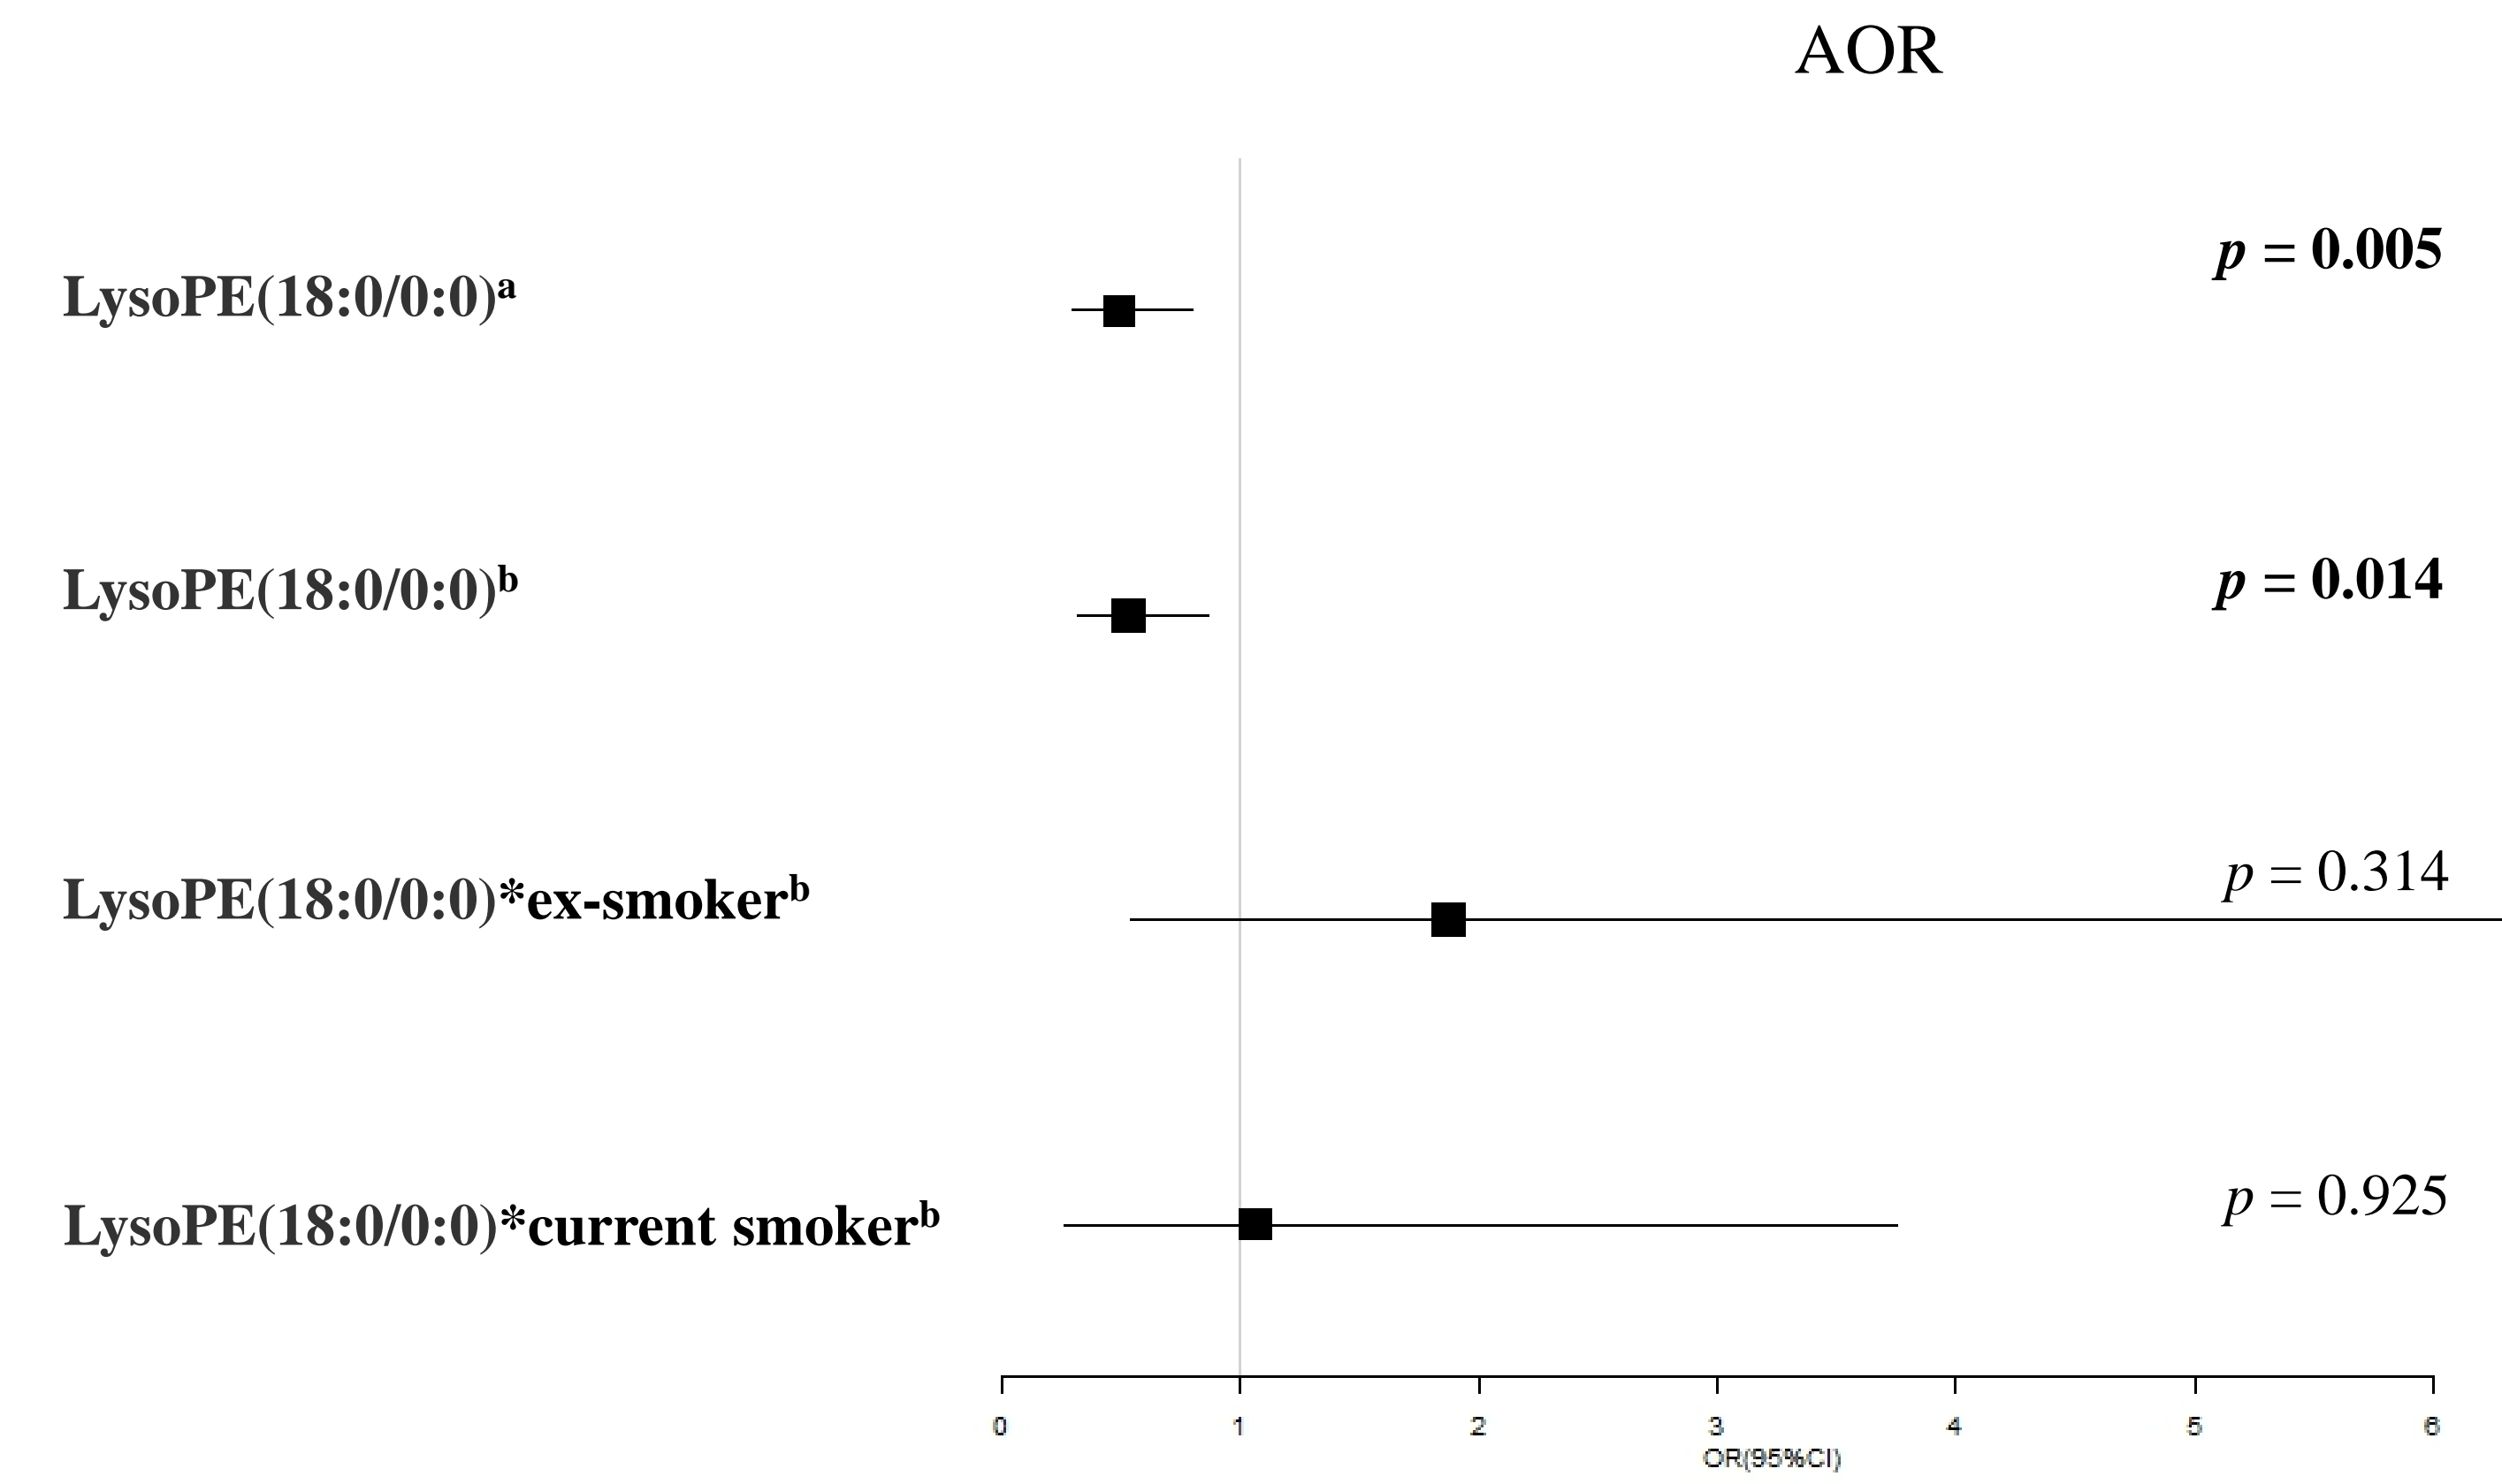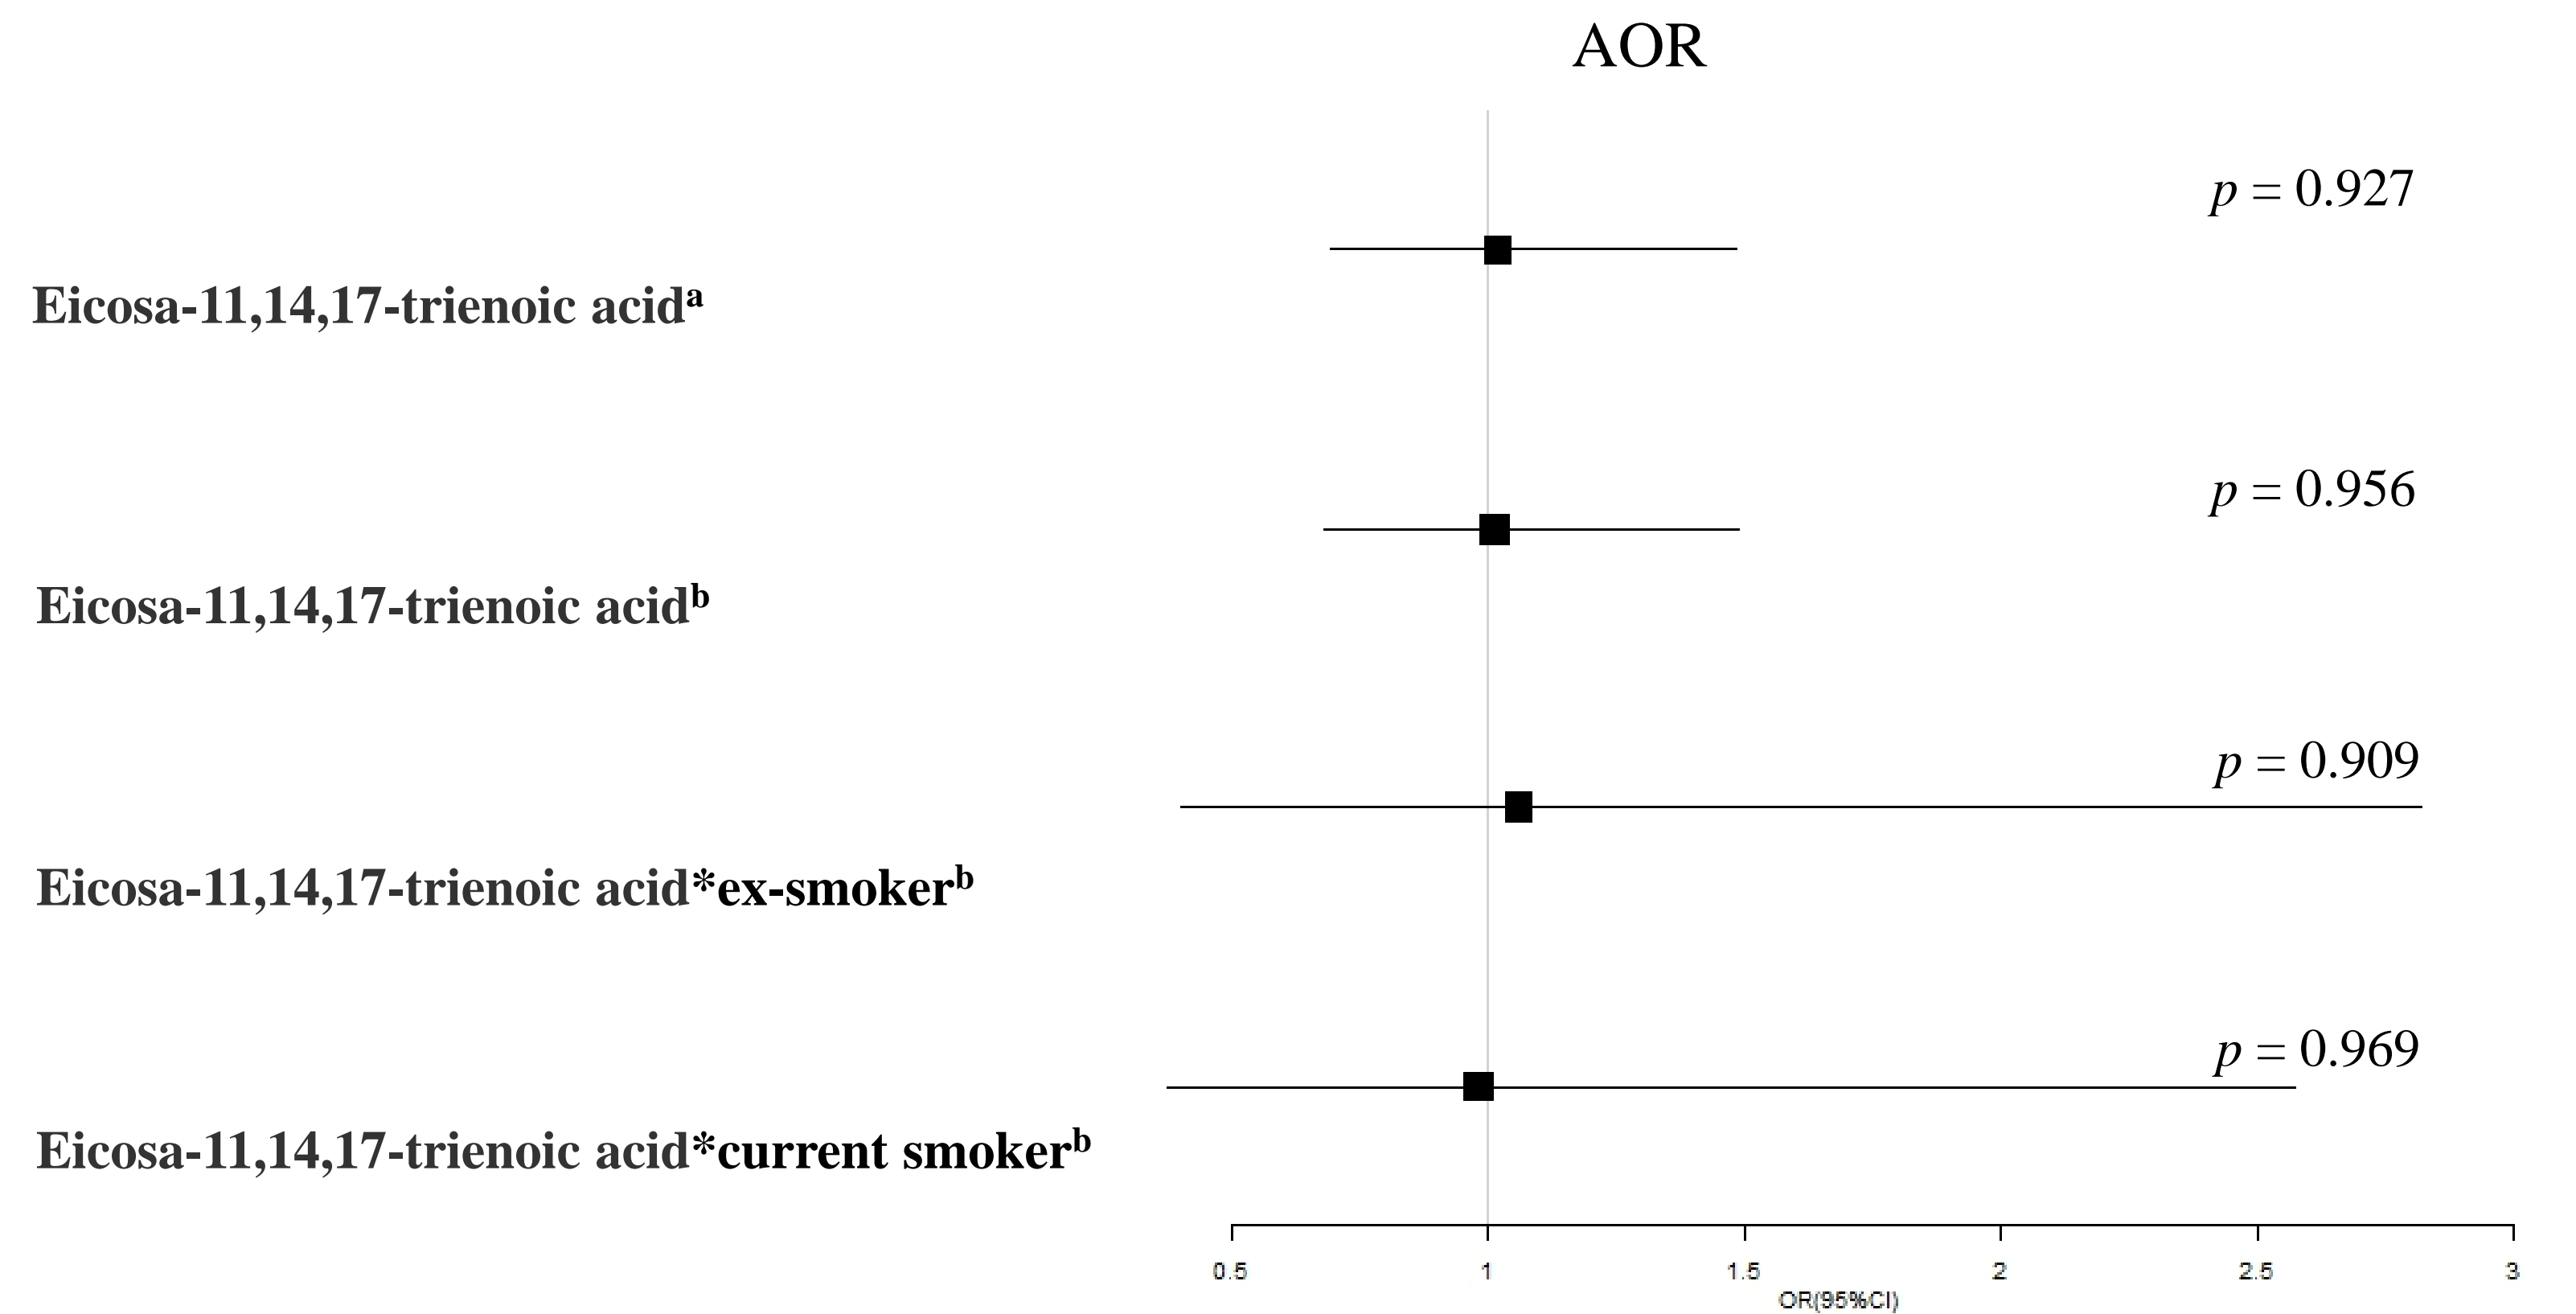

Supplement: MOESM1 [file 26491028]
